1 **Title: Motor skill learning leads to the increase of planning horizon**

2

3 **Authors**

4 Luke Bashford<sup>1,2,3,+,\*</sup>, Dmitry Kobak<sup>1,2,3,4++,\*</sup>, Jörn Diedrichsen<sup>5</sup>, Carsten Mehring<sup>1,2,3</sup>

5

6 <sup>1</sup>Bernstein Center Freiburg, University of Freiburg, Freiburg, Germany

7 <sup>2</sup>Faculty of Biology, University of Freiburg, Freiburg, Germany

8 <sup>3</sup>Imperial College London, London, UK

9 <sup>4</sup>Chamalimaud Centre for the Unknown, Lisbon, Portugal

10 <sup>5</sup>Brain and Mind Institute & Department for Computer Science, University of Western Ontario,

11 Ontario, Canada

12 <sup>+</sup>Now at: Caltech, Pasadena, CA, USA

13 <sup>++</sup>Now at: Institute for Ophthalmic Research, Tübingen University, Tübingen, Germany

14 <sup>\*</sup>Equal contribution

15

16 **Corresponding author**

17 Luke Bashford, bashford@caltech.edu

18 **Abstract**

19

20 We investigated motor skill learning using a path tracking task, where human subjects had to  
21 track various curved paths at a constant speed while maintaining the cursor within the path  
22 width. Subjects' accuracy increased with practice, even when tracking novel untrained paths.  
23 Using a “searchlight” paradigm, where only a short segment of the path ahead of the cursor  
24 was shown, we found that subjects with a higher tracking skill took a longer section of the  
25 future path into account when performing the task. An optimal control model with a fixed  
26 horizon (receding horizon control) that increases with tracking skill quantitatively captured the  
27 subjects' movement behaviour. These findings demonstrate that human subjects increase their  
28 planning horizon when acquiring a motor skill.

## 29 **Introduction**

30

31           The human motor system is able to acquire a remarkable array of motor skills.  
32 Informally, a person is said to be “skilled” if he or she is able to perform faster and at the same  
33 time more accurate movements than other, unskilled, individuals. What we don't know,  
34 however, is what learning processes and components underlie our ability to move better and  
35 faster. One component may be relatively “cognitive”, involving the faster and more  
36 appropriate selection and planning of upcoming actions (Diedrichsen and Kornysheva, 2015;  
37 Wong et al., 2015). Another component may be related to motor execution – the ability to  
38 produce and fine control difficult combinations of muscle activations (Shmuelof et al., 2012;  
39 Waters-Metenier et al., 2014). Depending on the structure of the task, changes in visuo-motor  
40 processing or feedback control may also contribute to skill development. Motor adaptation,  
41 extensively studied using visuomotor and force perturbations [for a recent review see  
42 (Shadmehr et al., 2010)], may play a certain role in stabilizing performance, but it can not by  
43 itself lead to improvements in the speed-accuracy trade-off (Wolpert et al., 2011).

44           A task commonly used in the experiments on motor skill learning is sequential  
45 finger tapping, where subjects are asked to repeat a certain tapping sequence as fast and as  
46 accurately as possible (Karni et al., 1998, 1995; Petersen et al., 1998; Walker et al., 2002).  
47 Improvement in such a task can continue over days, but previous papers have focussed mostly  
48 on the learning that is specific to the trained sequence(s) (Karni et al., 1995).

49           Many real-world tasks, however, do not involve the production of a fixed  
50 sequence of motor commands, but the flexible planning and execution of movements. Such  
51 flexibility is often well described by optimal feedback control models (Braun et al., 2009;  
52 Diedrichsen et al., 2010; Todorov and Jordan, 2002) where the skilled actor appears to

53 compute “on the fly” the most appropriate motor command for the task at hand. This requires  
54 demanding computations (Todorov and Jordan, 2002), and the human motor system likely  
55 has found heuristics to deal with this complexity. One way to reduce complexity of the  
56 control problem is to not optimize the whole sequence of motor commands that will achieve  
57 the ultimate goal, but to only optimise the current motor command for a short distance into  
58 the future. This idea is called receding horizon control, also known as model predictive  
59 control (Kwon and Han, 2005). Under this control regime, the system computes a feedback  
60 control policy that is optimal for a finite planning horizon. The control policy is then  
61 continuously updated as the movement goes on and the planning horizon is being shifted  
62 forward. This allows for adaptability, e.g. it can flexibly react to perturbations or unexpected  
63 challenges, as sensory information becomes available. Recent studies provided indirect  
64 evidence that favour the optimisation of short time-periods of a motor command (Dimitriou  
65 et al., 2013). The notion of planning horizon also arises in reinforcement learning, e.g. in the  
66 context of the so-called successor representation (Momennejad et al. 2017).

67 Motivated by these ideas, we propose that some of the skill of a down-hill skier or  
68 a race-car driver may lie not only in the ability to execute difficult motor commands, but also  
69 in the ability to plan further ahead and to optimize the movements for a longer time period into  
70 the future. In addition, we propose that the time span that subjects plan ahead increases with  
71 experience, leading to an increasing performance with training.

72 To test this idea, we designed an experimental condition which would allow us to  
73 measure the planning horizon that skilled actors are using when executing long sequence of  
74 movements that need to be planned “on the fly” – i.e. where the actual sequence of movements  
75 cannot be memorized. For this, we developed a path tracking task, where subjects had to  
76 maintain their cursor within a path that was moving towards them at a fixed speed. A similar  
77 task has been previously used in motor control research (Poulton, 1974), using a mechanical

78 apparatus with paths drawn on a paper roll that was moving at a fixed speed. It has been shown  
79 that subjects are able to increase their accuracy with training, but the different computational  
80 strategies between expert subjects and naïve performers remain unclear. In our study we use  
81 ‘searchlight’ trials in which subjects see various lengths of the approaching path ahead of their  
82 cursor to probe subjects forward planning and compare experts and novices in this respect.

83

## 84 **Materials and Methods**

### 85 **Subjects**

86 62 experimentally naïve subjects took part in this experiment (33 males and 29 females, age  
87 range 20-52 years old). Subjects gave informed consent and were paid 10 €/h. The experimental  
88 procedures received ethics approval from the University of Freiburg.

89

### 90 **Setup**

91 Subjects sat at a desk looking at a computer monitor (Samsung Syncmaster 226BW) located  
92 ~80cm away. A cursor displayed on the screen (Matlab and Psychophysics Toolbox Version  
93 3; Brainard, 1997) was under position control by movements of a computer mouse. The mouse  
94 could be moved on the desk in all directions but only the horizontal (left and right) component  
95 contributed to the cursor movement: the vertical position of the cursor was fixed at 5.7mm  
96 above the base of the screen.

97

### 98 **Task**

99 To begin each trial subjects had to press the space bar. This displayed the cursor ( $R=2.9\text{mm}$ ,  
100  $1.1\text{cm}$  from the bottom of the screen) and the path (width =  $2.83\text{cm}$ ) that extended from the top

101 to bottom of the screen (30cm). The path continuously moved downward on the screen at a  
102 vertical speed of 34.1cm/s. The initially visible path was a straight line centered in the middle  
103 of the screen with the cursor positioned in the middle of the path. Once this initial section  
104 moved through the screen, the path then followed a random curvature (Fig. 1A). Subjects were  
105 instructed to keep the cursor between the path borders at all times moving only in the horizontal  
106 plane and were told to be as accurate as possible. The cursor and path were displayed in white  
107 if the cursor was within the path and both turned red when it was outside the path, always on a  
108 black background.

109

110 The cursor position was sampled at 60 Hz and the tracking accuracy was defined for each trial  
111 as the percentage of time steps when the cursor was inside the path. Running accuracy values  
112 were continuously displayed in the top left corner of the screen and final accuracies were  
113 displayed between the trials.

114

115 This experiment is based on a previous version where subjects were asked to track static  
116 randomly curved paths in 2D as quickly as possible without touching the sides [unpublished  
117 data, (Bashford et al., 2015)]. We later found that the 1D paradigm presented here was better  
118 suited to study the planning horizon as the speed was fixed.

## 119 **Paradigm**

120 Subjects were randomly assigned into two groups: expert (N=32) and naive (N=30). The  
121 paradigm included a training (expert group only) and a testing (all subjects) phase. Subjects in  
122 the expert group trained over 5 consecutive days, each day completing 30 minutes of path  
123 tracking (10 of 3-minute trials with short breaks in-between, searchlight length (s) 100%). If  
124 the performance improved from one trial to the next subjects saw a message saying  
125 “Congratulations! You got better! Keep it up!”, otherwise the message “You were worse this

126 time! Try to beat your score!” was shown. The training paths were randomly generated on the  
127 fly. Experts performed the testing set of trials after a short break following training on the final  
128 (5th) day. Naïve subjects performed only the testing set of trials.

129

130 The testing phase lasted 30 min (30 of 1-minute trials with breaks in-between) using 30  
131 different pre-generated paths that were the same for all subjects. The testing phase in this  
132 experiment contained 3 normal trials ( $s=100\%$ ) and 27 searchlight trials ( $s=10-90\%$ ) where  
133 some upper part of the path was not visible. Three blocks of 10 trials with the searchlight length  
134 ranging from  $s=10\%$  to  $s=100\%$  (in steps of 10%) were presented, with the order shuffled in  
135 each block; the same fixed pseudorandom sequence was used for all subjects.

136

### 137 **Path generation**

138 Paths were generated before each trial start during training and a pre-generated fixed set was  
139 produced in the same way for testing. Each path was initialized to start at the bottom middle of  
140 the screen and the initial 30 cm of each path were following a straight vertical line. Subsequent  
141 points of the path midline had a fixed Y step of 40 pixels (1.1 cm) and random independent  
142 and identically distributed (iid) X steps drawn from a uniform distribution from 1 to 80 pixels  
143 (2.7mm – 2.2cm). Any step that would cause the path to go beyond the right or left screen  
144 edges was recalculated. The midline was then smoothed with a Savitzky-Golay filter (12th  
145 order, window size 41) and used to display path boundaries throughout the trial. All of the  
146 above parameters were determined in pilot experiments to create paths which were very hard  
147 but not impossible to complete after training.

148

## 149 **Statistical analysis**

150 In all cases, we used nonparametric rank-based statistical tests to avoid relying on the normality  
151 assumption. In particular, we used Spearman's correlation coefficient instead of the Pearson's  
152 coefficient, Wilcoxon signed-rank test instead of paired two-sample t-test, and Wilcoxon-  
153 Mann-Whitney ranksum test instead of unpaired two-sample t-test.

154

155 We initially recorded N=10 subjects in each group and observed statistically significant  
156 ( $p < 0.05$ ) effect that we are reporting here: positive correlation between the asymptote  
157 performance and the horizon length, as estimated via the changepoint and exponential models.  
158 We then recorded another N=20/22 (naïve/expert) subjects per group to confirm this finding.  
159 This internal replication confirmed the effect ( $p < 0.05$ ). The final analysis reported in this study  
160 was based on all N=62 subjects together.

161

## 162 **Changepoint and Exponential model**

163 We used two alternative models to describe the relationship between the searchlight length and  
164 the accuracy: a linear changepoint model and an exponential model. We used two different  
165 models to increase the robustness of our analysis and both models support our conclusions.

166

167 The changepoint model is defined by

$$168 \quad y = \begin{cases} cs + o & \text{if } s \leq h_{cp} \\ ch_{cp} + o & \text{if } s > h_{cp} \end{cases}$$

169 where  $y$  is the subject's performance,  $s$  the searchlight length and  $(c, o, h_{cp})$  are the subject-  
170 specific parameters of the model which define the baseline performance at searchlight 0% ( $o$ ),



171 the amount of increase of performance with increasing searchlight ( $c$ ) and the planning horizon  
172 ( $h_{cp}$ ) after which the performance does not increase any further.

173

174 The exponential model is defined by

$$175 \quad y = \psi - \exp(-\rho s + d)$$

176 where the subject-specific parameters ( $\psi$ ,  $d$ ,  $\rho$ ) specify the performance at searchlight 0% ( $\psi -$   
177  $\exp[d]$ ), the asymptote for large searchlights ( $\psi$ ) and the speed of performance increase ( $\rho$ ).

178 This function monotonically increases but it never plateaus. The speed of the increase depends  
179 on the parameter  $\rho$  with larger values meaning faster approaching the asymptote. We used the  
180 following quantity as a proxy for the “effective” planning horizon:  $10 + \log(5)/\rho$ . It can be  
181 understood as the searchlight length that leads to performance being five times closer to the  
182 asymptote than at  $s=10\%$ . The  $\log(5)$  factor was chosen to yield horizon values of roughly the  
183 same scale as with the changepoint model above.

184

185 Both models (changepoint and exponential) were fit to the raw performance data of each  
186 subject, i.e. to the 30 data points, 3 for each of the 10 searchlight length values. The exponential  
187 fit (see Equation 2 in the Results) was done with the Matlab's `nlinfit()` function, implementing  
188 Levenberg-Marquardt nonlinear least squares algorithm. The changepoint fit (see Equation 1  
189 in the Results) was done with a custom script that worked as follows. It tried all values of  $h_{cp}$   
190 on a grid that included  $s=10\%$  and then went from  $s=20\%$  to  $s=100\%$  in 100 regular steps. For  
191 each value of  $h_{cp}$  the other two parameters can be found via linear regression after replacing all  
192  $s > h_{cp}$  values with  $h_{cp}$ . We then chose  $h_{cp}$  that led to the smallest squared error.

193

## 194 **Trajectory analysis**

195 To shed light on the learning process we analysed additional parameters of the subjects'  
196 movement trajectories.

197 First, we computed the time lag between the subjects' movement trajectories and the midline  
198 of the paths (Figure 4A-B). To compute the lags, we interpolated both cursor trajectories and  
199 path midlines 10-fold (to increase the resolution of our lag estimates). We computed the  
200 Pearson correlation coefficient between cursor trajectory and path midline for time shifts  
201 from of -300 to 300 ms, and defined the time lag as the time shift maximizing the correlation.  
202 Second, we extracted the cursor trajectories in all sections across all paths that shared a  
203 similar curved shape to explore the differences in cursor position at the apex of the curve  
204 (Figure 4C). The segments were selected automatically by sliding a window of length 18 cm  
205 across the path. We included all segments that were lying entirely to one side (left or right) of  
206 the point in the middle of the sliding window ("C-shaped" segments), with the upper part and  
207 the lower part both going at least 4.5 cm away in the lateral direction (see Figure 3). Our  
208 results were not sensitive to modifying the exact inclusion criteria.

209 To draw the 75% coverage areas of the path inflection points in each group (Figure 4C), we  
210 first performed a kernel density estimate of these points using the Matlab function `kde2d()`,  
211 which implements an adaptive algorithm suggested in (Botev et al., 2010). After obtaining the  
212 2d probability density function  $p(x)$ , we found the largest  $h$  such that  $\int p(x)dx > 0.75$  over the  
213 area where  $p(x) > h$ . We then used Matlab's `contour()` function to draw contour lines of height  $h$   
214 in the  $p(x)$  function.

215

216

217

## 218 Receding horizon model

219 We modelled subjects' behaviour by a stochastic receding horizon model in discrete time  $t$ . In  
220 receding horizon control (RHC, Kwon and Han, 2005) motor commands  $u_t$  are computed to  
221 minimize a cost function  $L_t$  over a finite time horizon of length  $h$ :

$$222 \quad \text{minimize } L_t(\{x_t\}, \{u_t\}) \quad (1)$$

$$223 \quad \text{subject to } L_t = \sum_{k=1}^h l_{t+k}$$

$$224 \quad x_{t+1} = f(x_t, u_t)$$

225 where  $f$  defines the dynamics of the controlled system. Equation (1) is equivalent to an optimal  
226 control problem over the fixed future interval  $[t + 1, t + h]$ . Solving (1) yields a sequence of  
227 optimal motor commands  $\{u_0^{opt}, u_1^{opt}, \dots, u_{h-1}^{opt}\}$ . The control applied at time  $t$  is the first  
228 element of this sequence, i.e.  $u_t = u_0^{opt}$ . Then, the new state of the system  $x_{t+1}$  is measured  
229 (or estimated) and the above optimization procedure is repeated, this time over the future  
230 interval  $[t + 2, t + 1 + h]$ , starting from the state  $x_{t+1}$ .

231

232 Applying RHC to our experimental task, the dynamics of the cursor movement was modelled  
233 by a linear first-order difference equation:

$$234 \quad x_{t+1} = x_t + u_{t-\tau} + \eta_t \quad \eta_t \in \mathcal{N}(0, \sigma^2) \quad (2)$$

235 where  $t$  is the time step,  $x_t$  the cursor position at time  $t$ ,  $u_t$  is the motor command applied at  
236 time  $t$  and  $\tau$  the motor delay.  $\eta_t$  is the motor noise which was modelled as additive Gaussian  
237 white noise with zero mean and variance  $\sigma^2$ . We used the following cost function

$$238 \quad L_t = \sum_{k=\tau+1}^h [-\log(q_{t+k}) + \lambda |u_{t-\tau+k-1}|^2] \quad (3)$$

239 where  $L_t$  is the expected cost at time  $t$ ,  $q_{t+k}$  is the probability of the cursor being inside the path  
 240 at time  $t+k$ ,  $h$  is the length of the horizon in time and  $\lambda$  is the weight of the motor command  
 241 penalty. At every time step  $t$ ,  $L_t$  is minimized to compute  $u_t$  while  $\{u_0, \dots, u_{t-1}\}$  are known.  
 242 Consequently, the lower bound of the sum in (3) is  $\tau + 1$ . The cost function in (3) reflects a  
 243 trade-off between accuracy (first term, i.e.  $\log[q_{t+k}]$ ) and effort (second term) whereas their  
 244 relative importance is controlled by  $\lambda$ . Cost functions with a similar accuracy-effort trade-off  
 245 have been used previously to successfully model human motor behaviour (Todorov & Jordan  
 246 2002, Diedrichsen 2007, Braun et al. 2009).

247 We assume that subjects have acquired a forward model of the control problem and they can,  
 248 therefore, predict the cursor position at time  $t+1$  from the cursor position at time  $t$  and the motor  
 249 command in accordance with equation (2). We also assume that subjects have an accurate  
 250 estimate of the position of the cursor at time  $t$ , i.e.  $x_t$  is known. Subjects can then compute the  
 251 probability distribution of the cursor position at future times  $t+k$ , given by:

$$252 \quad p(x_{t+k} | x_t, \{u_{t-\tau}, u_{t-\tau+1}, \dots, u_{t-\tau+k-1}\}) = \frac{1}{\sqrt{2\pi k\sigma^2}} e^{-\frac{(\hat{x}_{t+k})^2}{2k\sigma^2}} \quad (5)$$

253 with

$$254 \quad \hat{x}_{t+i} = x_t + \sum_{l=1}^i u_{t-\tau+l-1} \quad (6)$$

255 The probability of the cursor being inside the path is then given by

$$256 \quad q_{t+k} = \int_{m_{t+k}-\frac{w}{2}}^{m_{t+k}+\frac{w}{2}} \frac{1}{\sqrt{2\pi k\sigma^2}} e^{-\frac{(\hat{x}_{t+k}-z)^2}{2k\sigma^2}} dz \quad (7)$$

257 where  $m_t$  is the position of the midline of the path at time  $t$  and  $w$  the width of the path. The  
 258 receding horizon model assumes that motor commands  $u_t$  are computed by minimizing the  
 259 cost  $L_t$  in each time step  $t$  for a fixed and known set of model parameters  $(h, \lambda, \tau, \sigma^2)$ . We  
 260 simplify the optimisation problem by approximating  $q_{t+k}$  by

$$q_{t+k} \approx w \frac{1}{\sqrt{2\pi k\sigma^2}} e^{-\frac{(\hat{x}_{t+k} - m_{t+k})^2}{2k\sigma^2}} \quad (8)$$

262 The higher  $k\sigma_k^2$  is relative to the path width  $w$ , the higher the accuracy of this approximation.

263 Note that the squared error is scaled by  $k\sigma^2$  and hence, errors in the future are discounted. This  
264 is a consequence of the used model of the cursor dynamics in (equation 2).

265 Using equation (8) and removing all terms which do not depend on  $u_t$ , we can derive a  
266 simplified cost function

$$\tilde{L}_t = \sum_{k=\tau+1}^h \left[ \frac{(\hat{x}_{t+k} - m_{t+k})^2}{2k\sigma^2} + \lambda |u_{t-\tau+k-1}|^2 \right] \quad (9)$$

268 Equation (9) shows that the trade-off between accuracy and the magnitude of the motor  
269 commands is controlled by  $\sigma^2\lambda$ . We therefore can eliminate one parameter and use the  
270 equivalent cost function

$$\tilde{L}_t = \sum_{k=\tau+1}^h \left[ \frac{(\hat{x}_{t+k} - m_{t+k})^2}{2k} + \tilde{\lambda} |u_{t-\tau+k-1}|^2 \right] \text{ with } \tilde{\lambda} = \sigma^2\lambda \quad (10)$$

272 The gradient of the cost function  $\tilde{L}_t$  is given by

$$\frac{\partial \tilde{L}_t}{\partial u_{t+j}} = 2\tilde{\lambda} u_{t+j} + \sum_{k=j+(\tau+1)}^h \left[ \frac{(\hat{x}_{t+k} - m_{t+k})}{k} \right] \quad (11)$$

274 with  $j = 0, \dots, h - (\tau + 1)$ . The Hessian of the cost function is given by

$$\frac{\partial^2 \tilde{L}_t}{\partial u_{t+m} \partial u_{t+n}} = 2\delta_{m,n}\tilde{\lambda} + \sum_{k=\max(m,n)+(\tau+1)}^h \frac{1}{k} \quad (12)$$

276 with  $m, n = 0, \dots, h - (\tau + 1)$ . For  $\tilde{\lambda} = 0$  all pivots of the Hessian matrix are positive and  
277 therefore the Hessian is positive definite for  $\tilde{\lambda} = 0$ . For the general case  $\tilde{\lambda} > 0$  the Hessian  
278 remains positive definite as  $H_2 = H_1 + D$  is positive definite if  $H_1$  is positive definite and  $D$  is  
279 a diagonal matrix with only positive diagonal entries. Given the positive definiteness of the  
280 Hessian we can conclude that the cost function  $\tilde{L}_t$  is strictly convex with a unique global

281 minimum. Setting the gradient (12) to  $\mathbf{0}$  defines a system of  $h-\tau$  linear equations with  $h-\tau$   
 282 unknowns ( $u_t, \dots, u_{t+h-(\tau+1)}$ ) which solution minimizes  $\tilde{L}_t$ . The solution can be computed  
 283 efficiently using standard numerical techniques. We used the ‘linsolve’ function of MATLAB  
 284 (R2016b) which uses LU factorization.

285 As a measure of task performance, we computed the expected time inside the path from the  
 286 model trajectory  $z_t$  as follows

$$290 \quad a = \frac{1}{T} \sum_{t=1}^T \left[ 1 - \int_{m_{t-\frac{w}{2}}}^{m_{t+\frac{w}{2}}} \frac{1}{\sqrt{2\pi\sigma^2}} e^{-\frac{(z_t-\eta)^2}{2\sigma^2}} d\eta \right] \quad (13)$$

287 with  $T$  depicting the number of time steps per path. The lag was computed by maximizing the  
 288 correlation coefficient between the model trajectories and the path midline identical to how the  
 289 lag was computed for the subjects’ trajectories.

291 When applying the model to the searchlight path we made the additional assumption that the  
 292 model horizon increases with searchlight length  $s$  up to a maximal value  $h_{max}$  beyond which  
 293 the model horizon remains constant:

$$295 \quad h(s) = \begin{cases} s, & s < h_{max} \\ h_{max}, & s \geq h_{max} \end{cases} \quad (14)$$

294

### 296 **Fitting the receding horizon model to subjects’ behaviour**

297 We fitted the RHC model to the subjects’ movement trajectories in the searchlight testing paths  
 298 using Bayesian inference (Gelman et al. 2000). The model parameters were estimated by  
 299 computing their expected values from the posterior distribution

$$300 \quad \hat{\beta} = \langle \beta \rangle = \int \beta p(\beta|v) d\beta \quad (15)$$

301 where  $\beta$  is the model parameter,  $v$  the movement trajectory data of a subject and  $p(\beta|v)$  the  
 302 posterior probability distribution for  $\beta$ . We approximated the integral in (15) by sampling from  
 303 the posterior distribution using the Metropolis algorithm which can sample from a target

304 distribution that can be computed up to a normalizing constant (Gelman et al. 2000). The RHC  
 305 model has four parameters  $(h_{max}, \tau, \tilde{\lambda}, \sigma^2)$  out of which three  $(h_{max}, \tau, \tilde{\lambda})$  affect the shape of  
 306 the trajectory (cf. equation (10)). Assuming a flat prior for the model parameters, i.e. .  
 307  $p(h_{max}, \tau, \tilde{\lambda}) = \text{const.}$ , and a non-informative prior for the error-variance  $\delta^2$ , i.e.  $p(\delta^2) = 1/\delta^2$   
 308 (Gelman et al 2000), we obtained the following equation for the posterior

$$312 \quad p(\beta|w) \propto p(h_{max}, \tau, \tilde{\lambda}) \frac{1}{\delta^{2+N}} e^{-\frac{mse(h_{max}, \tau, \tilde{\lambda})}{2\delta^2}} \quad (16)$$

309 where  $mse(h_{max}, \tau, \tilde{\lambda})$  is the mean squared error between the model and the subject movement  
 310 trajectories and  $N$  the number of trials. The mean squared error between the movement  
 311 trajectories of a subject and the model is given by

$$313 \quad mse(h_{max}, \tau, \tilde{\lambda}) = \frac{1}{10T|\mathcal{F}|} \sum_{s=1}^{10} \sum_{j \in \mathcal{F}_s} \sum_{t=1}^T \left( v_t^{(s,j)} - z_t^{(s,j)}(h_{max}, \tau, \tilde{\lambda}) \right)^2 \quad (17)$$

314 with  $T$  depicting the number of time steps per path,  $\mathcal{F}_s$  the set of paths ids for searchlight  $s$ ,  
 315  $v_t^{(s,j)}$  the movement of subject  $i$  at time  $t$  in path  $j$  for searchlight  $s$  and  $z_t^{(s,j)}(h_{max}, \tau, \tilde{\lambda})$  the  
 316 corresponding movement predicted by the RHC model.

317 To save computation time, we precomputed the  $mse$  for specific discrete combinations of the  
 318 model parameters. The model horizon parameter  $h_{max}$  could take any integer value between 1  
 319 and 26 given a maximum possible planning horizon of 30cm (vertical screen size) which is  
 320 equivalent to  $30\text{cm} / \left( 34 \frac{\text{cm}}{\text{s}} \cdot \frac{1}{30} \text{s} \right) = 30\text{cm} / \left( \frac{34}{30} \text{cm} \right) \approx 26$  time steps, where 34 cm/s is the  
 321 path speed and 1/30s the time step. Hence, admissible values for the horizon parameter  
 322 corresponded to horizons of  $h_{max} = (1, \dots, 26) * \frac{34}{30} \text{cm}$ . For the delay we allowed the values  
 323  $\tau = (1, \dots, 15) * \frac{1}{30} \text{s}$ , assuming that subjects won't have larger delays than 500ms. In fact, the  
 324 maximum delay of a subject we found from fitting was 286 ms which is well below the limit  
 325 we imposed. The motor penalty parameter  $\tilde{\lambda}$  was allowed to take any of  $10^3$  logarithmically

326 equally spaced values between  $10^{-4}$  and  $10^7$  and 0. In total, we had, therefore,  
327  $26 \times 15 \times 1001 = 390390$  admissible parameter combinations for  $h_{max}$ ,  $\tau$  and  $\tilde{\lambda}$ . We simulated the  
328 model for all of these parameter values and computed the mean squared errors according to  
329 equation (17). We then used the Metropolis algorithm to generate  $10^6$  samples from the  
330 posterior distribution of the parameters. Each sample consisted of a 4-tuple of values for the  
331 parameters  $(h_{max}, \tau, \tilde{\lambda}, \delta^2)$ . We computed the motor noise parameter of the model  $\sigma^2$  from the  
332 estimated error-variance  $\delta^2$  as explained below and then  $\lambda = \tilde{\lambda}/\sigma^2$  (cf. equation 10). For each  
333 parameter sample we also computed the lag, as explained at the end of the previous section,  
334 and the task performance using equation (13). As a result, we obtained  $10^6$  parameter values,  
335 lags and task performances, which reflect samples from the posterior distribution of the model  
336 parameters.

337 To evaluate the quality of the model, we used three-fold cross-validation where in each fold  
338 the posterior distributions of the model parameters were estimated using the data from two of  
339 the three trials for each searchlight. The posterior distributions were then used to make model  
340 predictions of performance and lag in the remaining trial for each searchlight. This was done  
341 for each subject separately and the model predictions were compared to the experimentally  
342 observed performances and lags (cf. Fig. 5A-D).

343 Expected values of the model parameters were computed according to equation (13). Expected  
344 values were calculated for each cross-validation fold separately and then averaged across the  
345 three cross-validation folds. This yielded the model parameters  $h_{max}, \tau, \lambda, \sigma^2$  for each subject,  
346 shown in Fig. 5E-H.

347

348 *Estimation of the motor noise parameter from the error-variance*

349 If all model assumptions are fulfilled, the motor noise model parameter  $\sigma^2$  will be linearly  
350 related to the error-variance  $\delta^2$  and we should therefore be able to estimate  $\sigma^2$  from  $\delta^2$ . For



351 each subject we computed  $\sigma^2$  by minimizing the squared error between the model task  
352 performance (eq. 13) and the experimentally determined task performance. A scatter plot of  
353 the resulting  $\sigma^2$  over the error-variance  $\delta^2$  revealed an approximate linear relationship between  
354  $\sigma^2$  and  $\delta^2$ . We then determined the proportionality factor  $\alpha$  by linear-least squares regression  
355 of the model  $\sigma^2 = \alpha\delta^2$  and used it to compute  $\sigma^2$  from  $\delta^2$ . The linear-least squares regression  
356 was done for each subject separately, using only the  $\sigma^2$  and  $\delta^2$  values from all other subjects  
357 to avoid overfitting.

358

### 359 **Estimating the influence of model parameters on performance difference between expert** 360 **and naïve groups**

361 To estimate how much a single model parameter causes the experts' gain in performance we  
362 computed the performance of the model for naïve group parameters but with one parameter  
363 (horizon, motor noise, delay or motor penalty) changed to expert group values. We also  
364 performed the opposite procedure, replacing each parameter for each participants of the expert  
365 with those of the naïve group. Using the Bayesian inference approach described in the previous  
366 section, we replaced the full posterior distribution of the affected parameter with the posterior  
367 distribution from the other group. This procedure was carried out for each subject separately  
368 and the posterior of the affected parameter was replaced by the posterior of each subject from  
369 the other group separately. We then computed the posterior of the performance curve and from  
370 that the expected values of the performance by averaging. Hence, we obtained for each  
371 parameter change  $N_e \cdot N_n$  performance curves where  $N_e$  and  $N_n$  are the number of subjects in  
372 the expert and naïve group, respectively. These performance curves were averaged and  
373 compared to the average performances for the expert and naïve groups obtained for the fitted  
374 model (see Results for details).

375

376 Parts of the modelling computations were run on the high-performance computing cluster

377 NEMO of the University of Freiburg (<http://nemo.uni-freiburg.de>) using Broadwell E5-2630v4

378 2.2 GHz CPUs.

379

## 380 Results

381

### 382 Learning the Tracking Skill

383 We designed an experiment where subjects had to track a path moving towards them at a  
384 fixed speed (Fig. 1A and Methods). The narrow and wiggly path was moving downwards on a  
385 computer screen while the cursor had a fixed vertical position in the bottom of the screen and  
386 could only be moved left or right. Accuracy, our performance measure, was defined as the  
387 fraction of time that the cursor spent inside the path boundaries. One group of subjects (the  
388 expert group, N=32) trained this task for 30 minutes on each of 5 consecutive days. Another  
389 group (the naïve group, N=30) did not have any training at all. Both groups then performed a  
390 testing block that we describe below.

391

392

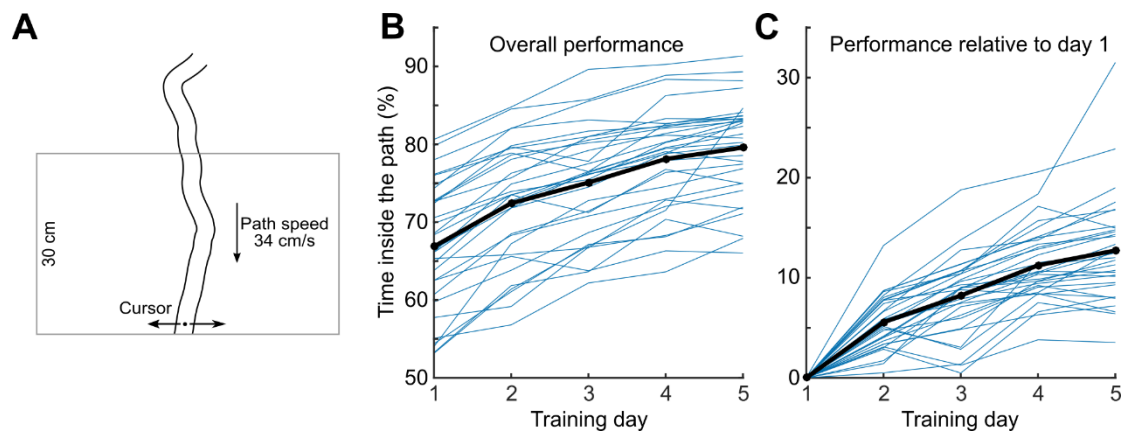

393

394 *Figure 1. Experimental Paradigm. (A) Subjects had to track a curved path that was dropping*  
395 *down from top to bottom of the screen with a fixed speed of 34 cm/sec by moving the cursor*  
396 *horizontally. (B) Expert subjects' performance over the 5 days of training. Bold line shows the*  
397 *group average, thin lines show individual subjects (each point is a mean over 3 trials with the*

398 *same searchlight length, 100%). (C) Expert subjects' performance over the 5 days of training*  
399 *with the performance on the first day subtracted.*

400

401

402 Over the course of five training days, the experts' accuracy increased from  $66.9 \pm 8.0\%$  to  
403  $79.6 \pm 6.4\%$  (mean  $\pm$  SD across subjects, first and last training day respectively) as shown on Figs  
404 1B-C, with the difference being easily noticeable and statistically significant ( $p = 8 \cdot 10^{-7}$ ,  
405  $z = 4.9$ , Wilcoxon signed rank test; Cohen's  $d = 1.8$ ,  $N = 32$ ). As all paths generated during the  
406 training were different, this difference cannot be ascribed to memorizing the path, therefore  
407 this improvement represents the genuine acquisition of the skill of path tracking.

408

#### 409 **Searchlight testing**

410 To unravel the mechanisms of skill acquisition we designed testing trials called “searchlight  
411 trials”, during which subjects had to track curved paths as usual, but could only see a certain  
412 part of the path (fixed distance  $s$ ) ahead of the cursor. The searchlight length  $s$  varied between  
413 10% and 100% of the whole path length in steps of 10% (the minimal  $s$  was  $\sim 3$ cm) to probe  
414 subjects' planning horizon. During the testing block all subjects completed 30 one-minute-long  
415 trials (three repetitions of each of the 10 values of  $s$ ). The average accuracy at full searchlight  
416  $s = 100\%$  was  $82.8 \pm 7.5\%$  for the expert group and  $65.7 \pm 8.4\%$  for the naïve group (mean  $\pm$  SD  
417 across subjects), with the difference being highly significant ( $p = 2 \cdot 10^{-9}$ ,  $z = 6.0$ , Wilcoxon-  
418 Mann-Whitney ranksum test, Cohen's  $d = 2.2$ ,  $N = 62$ ). The performance of the naïve subjects  
419 matched the initial performance of the expert subjects on their first day of training.

420

421 Before we present the rest of the data, let us consider several potential outcomes for the  
422 dependence of accuracy on the searchlight length (Fig. 2A). It is clear that for each subject,  
423 accuracy should be a non-decreasing function of searchlight length. The data presented in  
424 Poulton (1974) indicate that this function tends to become flat, i.e. subjects reach a performance  
425 plateau, after a certain value of searchlight length that we will call *planning horizon* (Fig. 2A  
426 Top), while we assume all subjects will be constrained to the similar poor performance at the  
427 smallest searchlight. For the expert group, this function has to reach a higher point at  $s=100\%$ ,  
428 but it could do so because the initial rise becomes steeper (Fig. 2A bottom left), or because the  
429 planning horizon increases (Fig. 2A bottom right), or possibly both.

430

431 Fig. 2B shows subjects' accuracy in the searchlights trials as a function of the searchlight length  
432  $s$ . It is obvious that all subjects were strongly handicapped at short searchlights, and at the  
433 shortest searchlight the performance of the two groups was similar with experts being only  
434 marginally better ( $42.5\pm 2.3\%$  for the expert group,  $41.4\pm 1.8\%$  for the naïve group,  $p=0.042$ ,  
435  $z=2.0$  Wilcoxon ranksum test; Cohen's  $d=0.5$ ,  $N=62$ ).

436

437

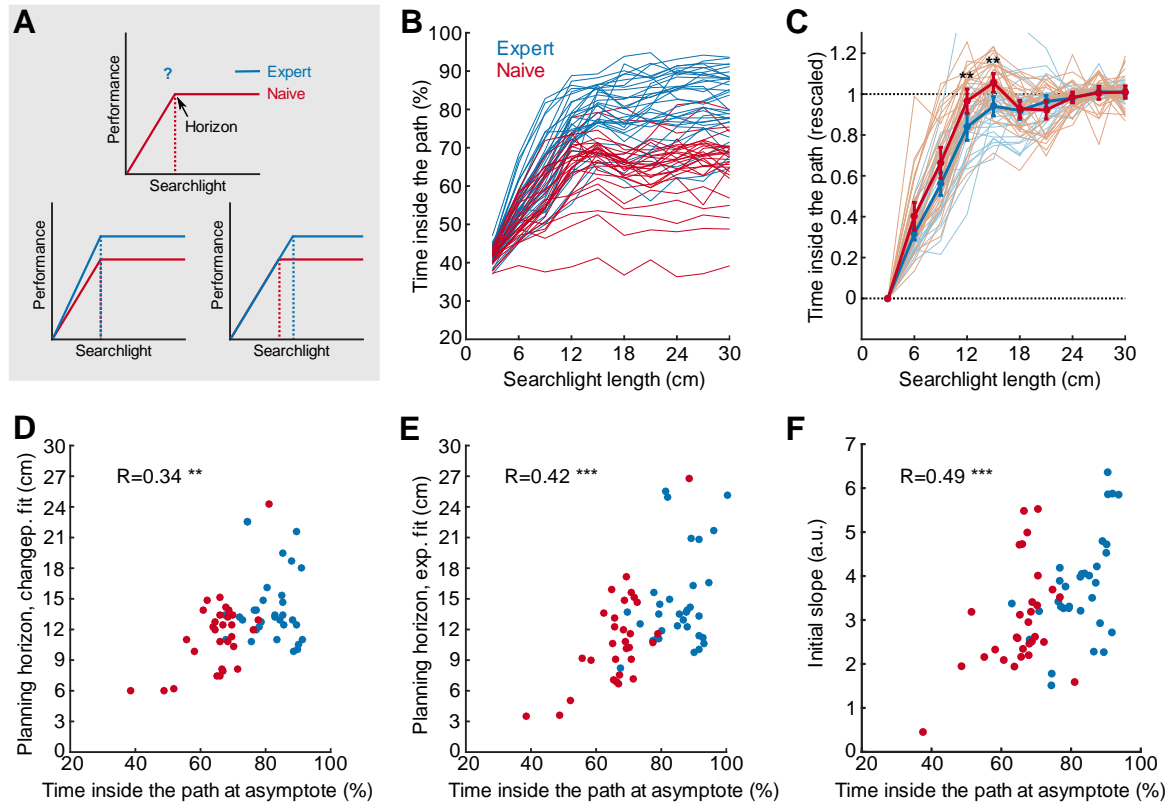

438

439

440 *Figure 2. Searchlight testing. (A) Expert subjects were trained to have a higher performance*  
441 *at full searchlight length (top). This could be achieved by an increased initial slope (bottom*  
442 *left) at smaller searchlight length and/or an increased planning horizon as indicated with*  
443 *dashed vertical lines (bottom right). (B) Mean tracking performance for each searchlight*  
444 *length for each individual subject, in blue for the expert group and in red for the naïve group.*  
445 *Faint lines show individual subjects and bold lines show group means. (C) Mean tracking*  
446 *performance for each searchlight length, rescaled for each subject to start at 0 and end at 1*  
447 *(see text). Error bars indicate 95% confidence intervals around the means, stars indicate*  
448 *significance between the groups (\*\*:  $p < 0.01$ , Wilcoxon rank sum test, Bonferroni-Holm*  
449 *corrected for multiple comparisons). (D-E) Planning horizon for each subject was defined by*  
450 *fitting a changepoint linear-constant curve (D) or an exponential curve (E) (see text). Both*  
451 *models yield an asymptote performance for each subject; the changepoint model yields a*

452 horizon length and the exponential fit yields an “effective” horizon length. The scatter plots  
453 show relation between the asymptote performance (as a proxy for subjects' skill) and their  
454 planning horizon. Spearman's correlation coefficients are shown on the plot (\*\*:  $p < 0.01$ , \*\*\*:  
455  $p < 0.001$ ). Colour of the dot indicates the group. (F) Scatter plot showing Spearman correlation  
456 coefficient between the planning horizon and initial slope of the curve (10-20% in A), colours  
457 and values as in D&E (\*\*\*:  $p < 0.001$ ).

458

459

460 Visual inspection of Fig. 2B suggests that both effects sketched in Fig. 2A contribute to expert  
461 performance. (i) the planning horizon for the expert group was longer than for the naïve group;  
462 and (ii) the expert group has higher accuracies in the initial part of the performance curve,  
463 before the performance plateaus.

464

465 To better visualize the change in performance across searchlight lengths, we linearly rescaled  
466 each subject's performance curve, first by subtracting the mean performance at  $s=10\%$  and then  
467 by dividing by the asymptote performance (computed as the mean performance across  $s=80\%$ -  
468  $100\%$ ). The resulting curves all start at 0 and end at 1 (Fig. 2C). We observed a significant  
469 difference between the groups at  $s=40\%$  &  $50\%$  ( $p=0.005$  and  $p=0.004$  respectively, Wilcoxon  
470 ranksum test,  $p$ -values adjusted for testing 6 searchlight lengths between 20% and 70% with  
471 Holm-Bonferroni procedure,  $N=62$ ), indicating that while naïve subjects had reached their  
472 plateau by then, the expert subjects kept increasing their performance. For this analysis we  
473 removed two naïve subjects with essentially flat searchlight curves (Fig. 1B), as rescaling those  
474 did not lead to meaningful results.

475

476 To investigate individual differences in tracking skill, we estimated the planning horizons of  
477 individual subjects (Fig. 2D). For this we fit each subject's performance ( $y$ ) with a changepoint  
478 linear-constant curve (see Methods), where the location of the changepoint defines the horizon  
479 length. We found that the novice group had an average horizon length of  $11.5 \pm 3.6$  cm  
480 (mean  $\pm$  SD) and the expert group a horizon length of  $14.2 \pm 3.5$  cm, with statistically significant  
481 difference ( $p=0.007$ ,  $z=2.7$ , Wilcoxon ranksum test; Cohen's  $d=0.8$ ,  $N=62$ ). We found a  
482 positive correlation between the horizon length and the asymptotic performance ( $R=0.34$ ,  
483  $p=0.006$ , Spearman correlation,  $N=62$ ).

484

485 In addition to the change-point model, we also quantified the planning horizon using a single  
486 exponential to fit the individual subjects' performance data (see Material and Methods). This  
487 analysis confirmed our results (Fig. 2E). We again observed a significant difference in the  
488 horizon length between the two groups ( $14.76 \pm 4.6$  cm vs.  $11.04 \pm 4.7$  cm, means  $\pm$  SD for both  
489 groups,  $p=0.002$ ,  $z=3.0$ , Wilcoxon ranksum test; Cohen's  $d=0.8$ ,  $N=62$ ). Again, we found a  
490 positive correlation between the asymptote performance and the effective horizon length  
491 ( $R=0.43$ ,  $p=0.0008$ , Spearman correlation,  $N=62$ ).

492

493 Not only was planning horizon positively correlated with tracking skill (the asymptote  
494 accuracy), but also the initial slope of the changepoint model. Fig. 2F shows the correlation  
495 between the initial slope and asymptote accuracy ( $R=0.49$ ,  $p=6 \cdot 10^{-5}$ , Spearman correlation,  
496  $N=62$ ) and a clear difference of the initial slope between the groups ( $p=0.008$ ,  $z=2.6$ , Wilcoxon  
497 ranksum test; Cohen's  $d=0.6$ ,  $N=62$ ). We therefore conclude that the difference between expert  
498 and naïve performances is a combination of both possibilities presented in Fig. 2A.

499

500



501 **Trajectory analysis**

502 Naïve subjects performed worse than the expert subjects at long searchlights but all subjects  
503 performed almost equally badly at short searchlights. What kinematic features can these  
504 differences be attributed to?

505

506 Clearly, at short searchlights, performance has to be reactive. To measure how quickly changes  
507 in the path were reflected in the motor commands, we computed the time lag between cursor  
508 trajectory and path midline (the lag maximizing cross-correlation between them). As Fig. 3A  
509 shows the lag was ~200 ms at s=10% for all subjects and dropped to ~0 ms at s=50% for the  
510 expert group. While many naïve subjects also decreased their lags to zero, 10 out of 30 never  
511 achieved the 0 ms lag. The five naïve subjects showing the largest lags at large searchlights  
512 were also those with the worst performance (Fig. 3B). Therefore, there was a strong negative  
513 correlation between the asymptote lag (mean across s=80-100%) and the asymptote  
514 performance (mean across s=80-100%) of  $r=-0.58$  (Fig. 3B,  $p=8 \cdot 10^{-7}$ , Spearman correlation,  
515  $N=62$ ).

516

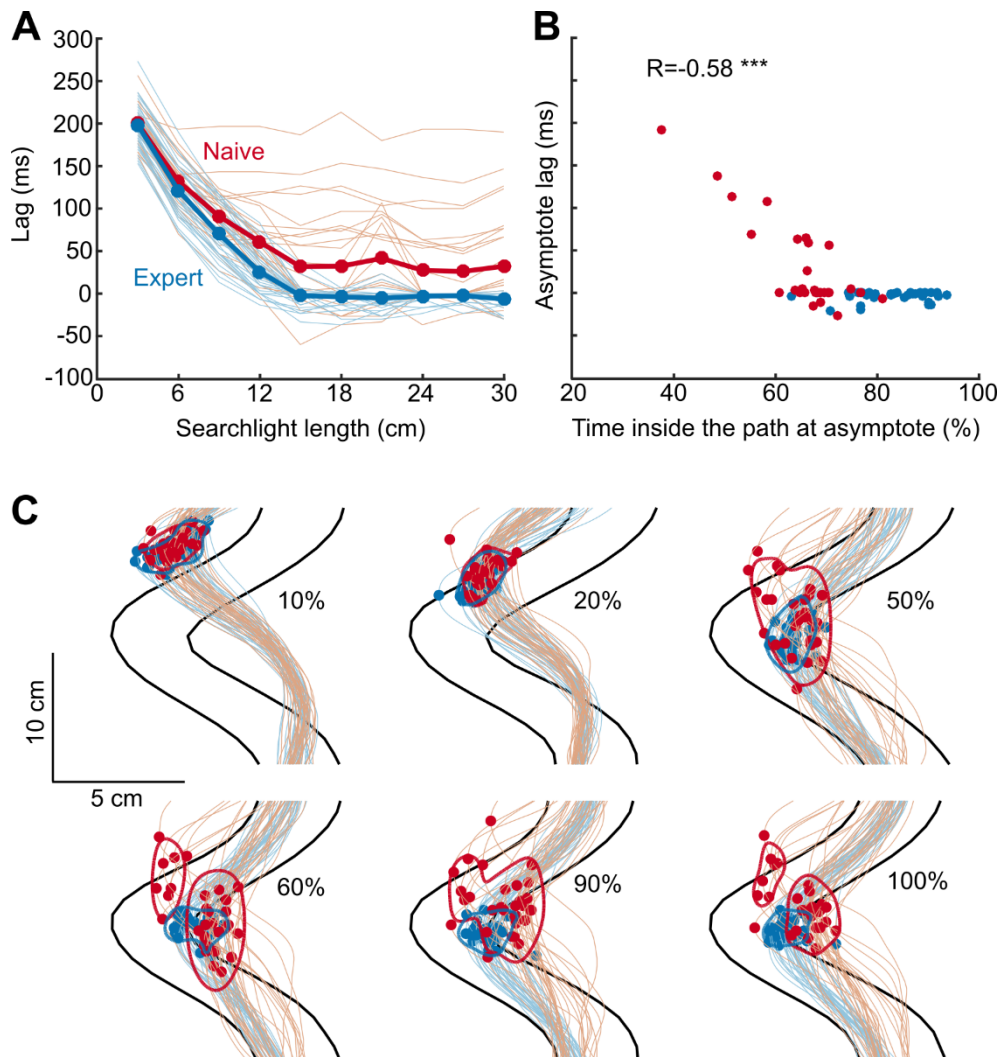

517

518

519 *Figure 3. Analysis of trajectories. (A) Mean time lag between cursor trajectory and path*  
520 *midline, for each searchlight length for each individual subject (faint lines) and mean of per-*  
521 *subject values (bold lines), in blue for the expert group and in red for the naïve group. (B)*  
522 *Asymptote lag and asymptote performance across subjects. Correlation coefficient is shown on*  
523 *the plot (\*\*\*) $p < 0.001$ ). Colour of the dot indicates the group. (C) Average per-subject*  
524 *trajectories in sharp bends (leftward bends were flipped to align them with the rightward*  
525 *bends). Each trajectory is averaged across approximately 40 bends (the number of bends*  
526 *varied across searchlight lengths). Colour of the lines indicates the group. Black lines show*  
527 *average path contour. Dots show turning points of the trajectory. Contour lines show the kernel*

528 *density estimate 75% coverage areas. Subplots correspond to searchlight lengths  $s=10\%$ ,  $20\%$ ,*  
529 *50%, 60%, 90% and 100%.*

530

531 Next, for each testing path we found all segments exhibiting sharp leftward or rightward bends  
532 (see materials and methods, our inclusion criteria yielded  $13\pm 5$  segments per path,  $\text{mean}\pm\text{SD}$ ).  
533 For each searchlight length  $s$  and for each subject, we computed the average cursor trajectory  
534 over all segments ( $N=38\pm 8$  segments per searchlight) after aligning all segments on the bend  
535 position (Fig. 3C, leftward bends were flipped to align them with the rightward bends). At  
536  $s=10\%$  all subjects from both groups follow very similar lagged trajectories, resulting in low  
537 accuracy. As searchlight increases, expert subjects reach zero lag and choose more and more  
538 similar trajectories, whereas naïve subjects demonstrate a wide variety of trajectories with some  
539 of them failing to reach zero lag and others failing to keep the average trajectory inside the path  
540 boundaries. To visualize this, we plotted the kernel density estimate 75% coverage contour of  
541 inflection points for each group. As the searchlight increases, the groups become less  
542 overlapping and the naïve group appears to form a bimodal distribution (Fig. 3C).

543

544 In summary, at very short searchlights all subjects performed poorly because in this reactive  
545 regime their trajectories lagged behind the path. At longer searchlights the expert subjects were  
546 able to plan their movement to accommodate the bends (the longer the searchlight the better),  
547 but naïve subjects failed to do so in various respects: either still lagging behind or not being  
548 able to plan a good trajectory.

549

### 550 **Receding horizon model analysis**

551 Next, we modelled subjects' behaviour by receding horizon control (RHC). In RHC a sequence  
552 of motor commands is computed to minimize the expected cost over a future time interval of

553 finite length, i.e. the horizon. After the first motor command is applied, the optimization  
554 procedure is repeated using a time interval shifted one time step ahead. See Methods section  
555 for a more detailed and formal description of RHC. As cost function, we used the weighted  
556 sum of a measure of inaccuracy (i.e. probability of being outside the path) and the magnitude  
557 of the motor cost (see Methods for details). Cost function with a similar trade-off between  
558 movement accuracy and motor command magnitude have been used previously to describe  
559 human motor behaviour in different tasks (Todorov & Jordan 2002, Diedrichsen 2007, Braun  
560 et al. 2009). The model has four different parameters: horizon ( $h$ ), motor noise ( $\sigma^2$ ), motor  
561 delay ( $\tau$ ) and motor command penalty weight ( $\lambda$ ).

562 We ran the model on the experimental paths to obtain simulated movement trajectories from  
563 which task performance and lag could be computed in the same way as for the experimental  
564 trajectories (Fig. 2 and 3). Our simulations revealed that both, a larger model horizon as well  
565 as a smaller motor noise parameter increased the task performance and decreased the lag (Fig.  
566 4). Hence, the experimentally observed higher performance and smaller lag of expert subjects  
567 compared to naive (Fig. 2B and 3A) could be explained either by an increased model horizon  
568 or by reduced motor noise in the model. However, the searchlight length at which the task  
569 performance of the model reached a plateau increased with model horizon and did not change  
570 or even decreased with a smaller motor noise parameter (Fig. 4A, C). Experimentally, on the  
571 other hand, we observed that subjects with a higher task performance reached their  
572 performance plateau at higher searchlights (Fig. 2D, E). This correlation between performance  
573 and plateau onset, that was observed experimentally, cannot be explained by the variation of  
574 the motor noise parameter across subjects, but is only consistent with an increase of the model  
575 planning horizon for subjects with higher performance.

576

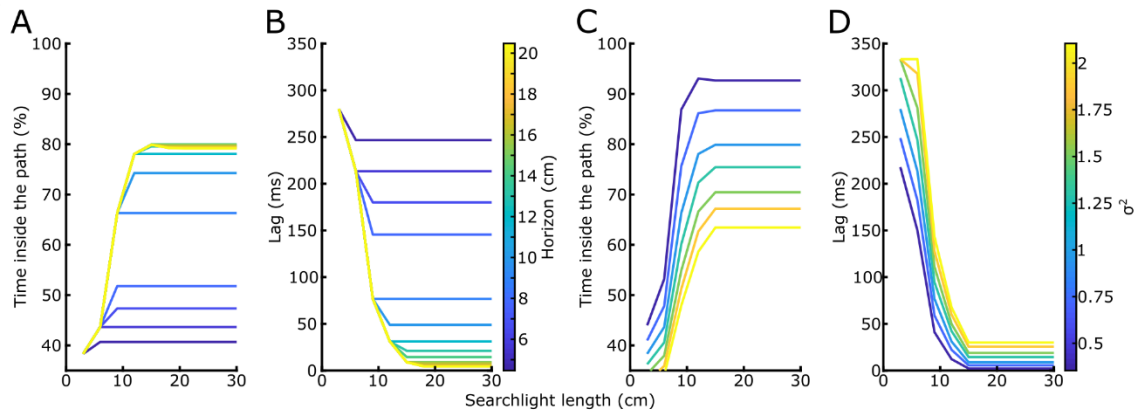

577

578 *Figure 4: Task performance and lag as a function of searchlight length for model simulations*

579 *with different horizons (A,B) or different amounts of motor noise (C,D). A motor noise of  $\sigma^2=1$*

580 *was used for (A,B) and a horizon of  $h=15\text{cm}$  for (C,D). The motor delay and motor command*

581 *penalty weight were fixed at  $\tau=200\text{ms}$  and  $\lambda=0.5$  in all simulations.*

582

583 Next, we used Bayesian inference to estimate the model parameters from the experimentally

584 observed movement trajectories (see Methods for details). Based on inferred distributions of

585 parameter values, we then predicted task performance and lag for each subject. To avoid over-

586 fitting cross-validation was used, i.e. fitting and prediction was done on different trials. Model

587 task performance and lag resembled the experimentally observed task performance and lag

588 with regard to their change across searchlights as well as with regard to the difference between

589 naïve and the expert subjects (Fig. 5A,B). On a single subject and trial level there was a high

590 correlation between model and experimental task performance (Fig. 5C, Spearman correlation

591  $r=0.9$ ,  $R^2=0.84$ ) and lags (Fig. 5D, Spearman correlation  $r=0.87$ ,  $R^2=0.88$ ).

592 We compared the estimated model parameters between expert and naïve subjects. The fitted

593 model horizon was higher for the expert group than for the naïve group (Fig. 5E, Wilcoxon

594 ranksum test:  $z=4.84$ ,  $p=1\cdot 10^{-6}$ ,  $N=62$ ) and was correlated with the horizon obtained from the

595 change point analysis (Spearman correlation,  $r=0.48$ ,  $p=7\cdot 10^{-5}$ ,  $N=62$ ) and the exponential fits

596 (Spearman correlation,  $r=0.43$ ,  $p=6 \cdot 10^{-4}$ ,  $N=62$ ). The fitted motor noise was significantly lower  
 597 for the expert than for the naïve group (Fig. 5F; Wilcoxon ranksum test:  $z=4.66$ ,  $p=3 \cdot 10^{-6}$ ,  
 598  $N=62$ ) while the delay and the penalty parameters were not different (Fig. 5G,H; delay:  
 599 Wilcoxon rank sum test,  $z=1.50$ ,  $p=0.13$ ; penalty: Wilcoxon rank sum test,  $z=0.528$ ,  $p=0.60$ ,  
 600  $N=62$ ). In the model, lower motor noise lead to steeper initial accuracy slope (Fig. 4C). The  
 601 expert group having lower estimated motor noise hence agrees well with our observation that  
 602 experts had steeper initial accuracy slope (Fig. 2F).  
 603

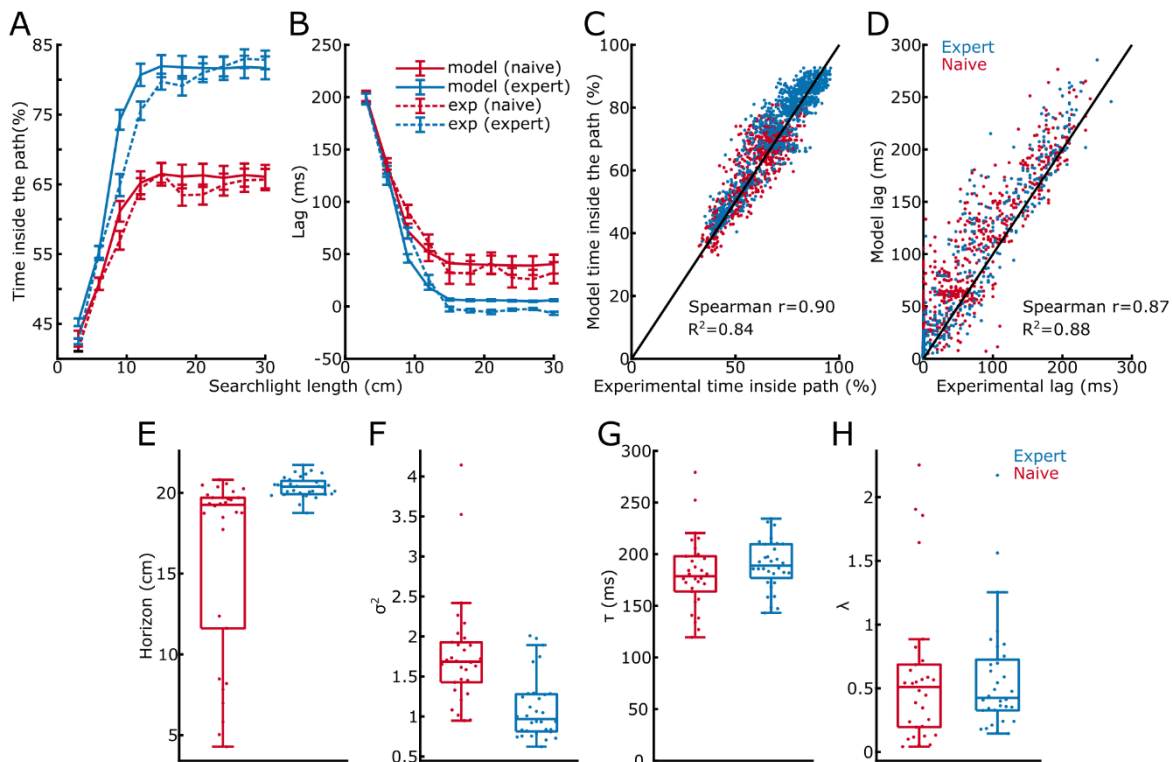

604  
 605 *Figure 5: Comparison between the receding horizon model and subjects' behaviour. A,B: Task*  
 606 *performance and lag as a function of the searchlight for expert and naïve subjects for the*  
 607 *experiments and model simulations. C,D: Scatter plot of model and experimental task*  
 608 *performance and lag for each trial of each subject. E-H: Model parameters for the subjects*  
 609 *from the naïve and the expert group. Each dot depicts one subject, boxplots show medians as*  
 610 *well as first and third quartiles.*

611

612 Using the model fits obtained above, we estimated how much of the experts' gain in asymptote  
613 performance was due to increased horizon vs. decreased noise. To do this, we simulate the  
614 model with naïve group parameters but expert group horizons (see Methods). This brings the  
615 performance almost half-way to the expert performance (for large searchlights the performance  
616 levelled off at 72% instead of 82% with lower horizon, compared to 66% for the naïve  
617 subjects). We observe roughly the same increase (to 75%) when we simulate the model with  
618 naïve group parameters but expert group noise levels. Similarly, when we use expert group  
619 parameters but naïve group horizons or noise levels, the performance drops approximately half-  
620 way to the naïve accuracy (74% for naïve horizon, 71% for naïve motor noise). In contrast, the  
621 delay and the motor penalty parameters had less influence on the asymptote performance (63%  
622 and 64% for naïve group parameters with expert delay or motor penalty; 80% for expert group  
623 parameters with naïve delay or motor penalty). From this we conclude that the increase in the  
624 experts' performance was caused by equal measures through an increase in planning horizon  
625 and the decrease in motor noise.

626

## 627 **Discussion**

628

629 We used a paradigm that allowed us to study skill development when humans had to track an  
630 unpredictable spatial path. The skill requires fast reactions to new upcoming bends in the road,  
631 but also a substantial “planning ahead” component – i.e. the anticipation and preplanning of  
632 movements that have to be made in the near future. We used the accuracy, i.e. the fraction of  
633 time the cursor was inside the path boundaries, as the measure of performance. We observed a  
634 substantial improvement in accuracy after 5 days of training (Fig. 1B,C). The paths were  
635 different on every trial, so the improvement in performance cannot be attributed to a memory  
636 for the sequence.

637

638 What changes in the motor system occur through learning that allowed skilled subjects to  
639 perform better? We hypothesized that one important component is an increased ability to take  
640 into account approaching path bends and to prepare for an upcoming movement segment. We  
641 directly estimated subjects' planning horizons by using a searchlight testing where only a part  
642 of the approaching curve was visible. We found that subjects with a higher tracking skill  
643 demonstrated larger planning horizons: on average ~14cm for the expert group vs. ~11cm for  
644 the naïve group, corresponding to the time horizons of ~0.4s and ~0.3s respectively.

645

646 Note that “planning”/“preparing” the movement can be interpreted differently depending on  
647 the computational approach. In the framework of optimal control (Todorov and Jordan, 2002),  
648 subjects do not plan the actual trajectory to be followed, but instead use an optimal time-  
649 dependent feedback policy and then execute the movement according to this policy. The  
650 observed increase in planning horizon can be interpreted in the framework of model predictive  
651 control, also known as receding horizon control, RHC (Kwon and Han, 2005). In RHC, the



652 optimal control policy is computed for a finite and limited planning horizon, which may not  
653 capture the whole duration of the trial. This policy is then applied for the next control step,  
654 which is typically very short, and the planning horizon is then shifted one step forward to  
655 compute a new policy. Hence, RHC does not use a pre-computed policy, optimal for an infinite  
656 horizon, but a policy which is only optimal for the current planning horizon. Increasing the  
657 length of the planning horizon is therefore likely to increase the accuracy of the control policy.  
658 In our experiments this would allow for a larger fraction of time spent within the path  
659 boundaries. We designed a simple RHC model to test directly which components in the model  
660 would have to change through training to quantitatively explain the subject's behavior. The  
661 dynamics of movement and the cost function were modelled in line with previous studies that  
662 used optimal control to describe human behaviour in various motor control and learning tasks  
663 (Todorov & Jordan 2002, Diedrichsen 2007, Braun et al. 2009). We fitted the RHC model to  
664 the behaviour of each subject and found that it was able to fit the data very accurately (Fig. 5).  
665 The experimentally observed differences between expert and naïve subjects were reflected in  
666 the model fits by higher planning horizons and lower motor noise parameters in the expert  
667 group. Our findings, thus, demonstrate that subjects' behaviour can be understood in the  
668 context of RHC, and longer planning horizons of the expert group indicate that subjects learn  
669 how to take advantage of future path information to improve motor performance.

670

671 The increased planning horizon does not account for all of the observed improvement in  
672 performance and further motor and non-motor processes may play a role in tracking skill  
673 learning. Indeed, our results show that expert subjects are even better at shorter searchlight  
674 lengths, a phenomenon that is explained by the model in assuming better motor acuity (lower  
675 motor noise) for expert subjects (Shmuelof et al., 2014, 2012). We estimated that in our  
676 experiments nearly half of the increased performance after practice is due to an increased

677 planning horizon while the other half can be accounted for by a reduction in the motor noise  
678 which may be interpreted as higher motor acuity.

679

#### 680 **Related work**

681 Ideas similar to the RHC were put forward in a recent study (Ramkumar et al., 2016) that  
682 suggested that movements are broken up in ‘chunks’ in order to deal with the computational  
683 complexity of planning over long horizons. That study suggests that monkeys increase the  
684 length of their movement chunks during extended motor learning over the course of many days  
685 which may be explained by monkeys increasing their planning horizon with learning. At the  
686 same time, the efficiency of movement control within the chunks improved with learning which  
687 may also be the result of a longer horizon. Despite these potential consistencies with our  
688 approach we note that in their model Ramkumar et al. (2016) assumed that ‘chunks’ are  
689 separated by halting points (i.e. points of zero speed) and movements within ‘chunks’ are  
690 optimized independently from each other. Our RHC model does not have independent  
691 movement elements but movements are optimized continuously.

692

693 Even though our study, to the best of our knowledge, is the first to directly investigate the  
694 evolution of the planning horizon during skill learning, similar path tracking tasks have been  
695 used before (Poulton, 1974). Using a track that was drawn on a rotating paper roll, these early  
696 studies found that the accuracy of the tracking increased with practice and with increasing  
697 searchlight length (which was modified by physically occluding part of the paper roll, Poulton,  
698 1974, p 187). These studies, however, did not investigate the effect of learning on the planning  
699 horizon.

700

701 More recent studies used path tracking tasks where the goal was to move as fast as possible  
702 while maintaining the accuracy (instead of moving at a fixed speed). In all of these studies the  
703 identical path was repeatedly presented. In one study subjects had to track a fixed maze without  
704 visual feedback and learnt to do it faster as the experiment progressed (Petersen et al., 1998);  
705 there the subjects had to once “discover” and then remember the correct way through the maze.  
706 In another series of experiments, Shmuelof et al. asked subjects to track two fixed semi-circular  
707 paths. Subjects became faster and more accurate over the course of several days (Shmuelof et  
708 al., 2012), but this increase in the speed and accuracy did not generalize to untrained paths  
709 (Shmuelof et al., 2014). In contrast to these previous path tracking studies, we used randomly  
710 generated paths throughout the experiment. By investigating the generalization of the path  
711 tracking skill to novel paths we could reveal an increasing planning horizon with learning.

712

### 713 **Conclusion**

714 In conclusion, we have established that people are able to learn the skill of path tracking and  
715 improve their skill over 5 days of training. This increase in motor skill is associated with the  
716 increased planning horizon. The dynamics of preplanning can be well described by a receding  
717 horizon control model.

718 **Acknowledgements**

719 The study was in parts supported by the German Federal Ministry of Education and Research  
720 (BMBF) grant 01GQ0830 to BFNT Freiburg-Tübingen. The authors acknowledge support by  
721 the state of Baden-Württemberg through bwHPC and the German Research Foundation (DFG)  
722 through grant no INST 39/963-1 FUGG. The authors also thank the ‘Struktur- und  
723 Innovationsfonds Baden-Württemberg (SI-BW)’ of the state of Baden-Württemberg for  
724 funding.

725

726 **Author Contribution**

727 Conceptualization, LB. DK. and CM; Methodology, LB. DK. JD and CM; Formal Analysis,  
728 LB. DK and CM; Writing – Original Draft, LB. DK and CM; Writing – Review and Editing,  
729 LB, DK, JD and CM.

730

## 731 References

- 732 Bashford, L., Kobak, D., Mehring, C., 2015. Motor skill learning by increasing the movement planning horizon.  
733 ArXiv14106049 Q-Bio.
- 734 Brainard, D.H., 1997. The Psychophysics Toolbox. *Spat. Vis.* 10, 433–436.  
735 <https://doi.org/10.1163/156856897X00357>
- 736 Braun, D.A., Aertsen, A., Wolpert, D.M., Mehring, C., 2009. Learning Optimal Adaptation Strategies in  
737 Unpredictable Motor Tasks. *J. Neurosci.* 29, 6472–6478. [https://doi.org/10.1523/JNEUROSCI.3075-](https://doi.org/10.1523/JNEUROSCI.3075-08.2009)  
738 08.2009
- 739 Diedrichsen, J., 2007. Optimal task-dependent changes of bimanual feedback control and adaptation. *Curr. Biol.*  
740 CB 17, 1675–1679. <https://doi.org/10.1016/j.cub.2007.08.051>
- 741 Diedrichsen, J., Kornysheva, K., 2015. Motor skill learning between selection and execution. *Trends Cogn. Sci.*  
742 19, 227–233. <https://doi.org/10.1016/j.tics.2015.02.003>
- 743 Diedrichsen, J., Shadmehr, R., Ivry, R.B., 2010. The coordination of movement: optimal feedback control and  
744 beyond. *Trends Cogn. Sci.* 14, 31–39. <https://doi.org/10.1016/j.tics.2009.11.004>
- 745 Dimitriou, M., Wolpert, D.M., Franklin, D.W., 2013. The Temporal Evolution of Feedback Gains Rapidly  
746 Update to Task Demands. *J. Neurosci.* 33, 10898–10909. [https://doi.org/10.1523/JNEUROSCI.5669-](https://doi.org/10.1523/JNEUROSCI.5669-12.2013)  
747 12.2013
- 748 Karni, A., Meyer, G., Jezzard, P., Adams, M.M., Turner, R., Ungerleider, L.G., 1995. Functional MRI evidence  
749 for adult motor cortex plasticity during motor skill learning. *Nature* 377, 155–8.  
750 <https://doi.org/10.1038/377155a0>
- 751 Karni, A., Meyer, G., Rey-Hipolito, C., Jezzard, P., Adams, M., Turner, R., Ungerleider, L., 1998. The  
752 acquisition of skilled motor performance : Fast and slow experience-driven changes in primary motor  
753 cortex. *Proc. Natl. Acad. Sci. U. S. A.* 95, 861–868.
- 754 Kwon, W.H., Han, S.H., 2005. Receding Horizon Control: Model Predictive Control for State Models,  
755 Advanced Textbooks in Control and Signal Processing. Springer-Verlag, London.
- 756 Petersen, S.E., Mier, H. van, Fiez, J.A., Raichle, M.E., 1998. The effects of practice on the functional anatomy  
757 of task performance. *Proc. Natl. Acad. Sci.* 95, 853–860.
- 758 Poulton, E.C., 1974. Tracking Skill and Manual Control. Academic Press, Incorporated, New York, N.Y.
- 759 Ramkumar, P., Acuna, D.E., Berniker, M., Grafton, S.T., Turner, R.S., Kording, K.P., 2016. Chunking as the  
760 result of an efficiency computation trade-off. *Nat. Commun.* 7, 12176.  
761 <https://doi.org/10.1038/ncomms12176>
- 762 Shadmehr, R., Smith, M.A., Krakauer, J.W., 2010. Error Correction, Sensory Prediction, and Adaptation in  
763 Motor Control. *Annu. Rev. Neurosci.* 33, 89–108. [https://doi.org/10.1146/annurev-neuro-060909-](https://doi.org/10.1146/annurev-neuro-060909-153135)  
764 153135
- 765 Shmuelof, L., Krakauer, J.W., Mazzoni, P., 2012. How is a motor skill learned? Change and invariance at the  
766 levels of task success and trajectory control. *J. Neurophysiol.* 578–594.  
767 <https://doi.org/10.1152/jn.00856.2011>
- 768 Shmuelof, L., Yang, J., Caffo, B., Mazzoni, P., Krakauer, J.W., 2014. The neural correlates of learned motor  
769 acuity. *J. Neurophysiol.* 112, 971–980. <https://doi.org/10.1152/jn.00897.2013>
- 770 Todorov, E., Jordan, M.I., 2002. Optimal feedback control as a theory of motor coordination. *Nat. Neurosci.* 5,  
771 1226–1235. <https://doi.org/10.1038/nn963>
- 772 Walker, M.P., Brakefield, T., Morgan, A., Hobson, J.A., Stickgold, R., 2002. Practice with Sleep Makes  
773 Perfect : Sleep-Dependent Motor Skill Learning. *Neuron* 35, 205–211.
- 774 Waters-Metenier, S., Husain, M., Wiestler, T., Diedrichsen, J., 2014. Bihemispheric Transcranial Direct Current  
775 Stimulation Enhances Effector-Independent Representations of Motor Synergy and Sequence Learning.  
776 *J. Neurosci.* 34, 1037–1050. <https://doi.org/10.1523/JNEUROSCI.2282-13.2014>
- 777 Wolpert, D.M., Diedrichsen, J., Flanagan, J.R., 2011. Principles of sensorimotor learning. *Nat. Rev. Neurosci.*  
778 12, 739–51. <https://doi.org/10.1038/nrn3112>
- 779 Wong, A.L., Lindquist, M.A., Haith, A.M., Krakauer, J.W., 2015. Explicit knowledge enhances motor vigor and  
780 performance: motivation versus practice in sequence tasks. *J. Neurophysiol.* 114, 219–232.  
781 <https://doi.org/10.1152/jn.00218.2015>
- 782
- 783
